# Supplementary material for: Investigating the Impact of Na2WO4 Doping in La2O3-Catalyzed OCM Reaction: A Structure–Activity Study via In Situ XRD-MS
Source: MDPI journal article supplement (doi:10.3390/catal14020150), 2024-02-18
Supplement: s1 [file s1]

Archive with 1 entries (1 files):
- catalysts-2827986-supplementary.pdf
