# Supplementary material for: Investigating the Impact of Na2WO4 Doping in La2O3-Catalyzed OCM Reaction: A Structure–Activity Study via In Situ XRD-MS
Source: MDPI journal article supplement (doi:10.3390/catal14020150), 2024-02-18
Supplement: s1 [file s1 › catalysts-2827986-supplementary.pdf]

*Supplementary Material*

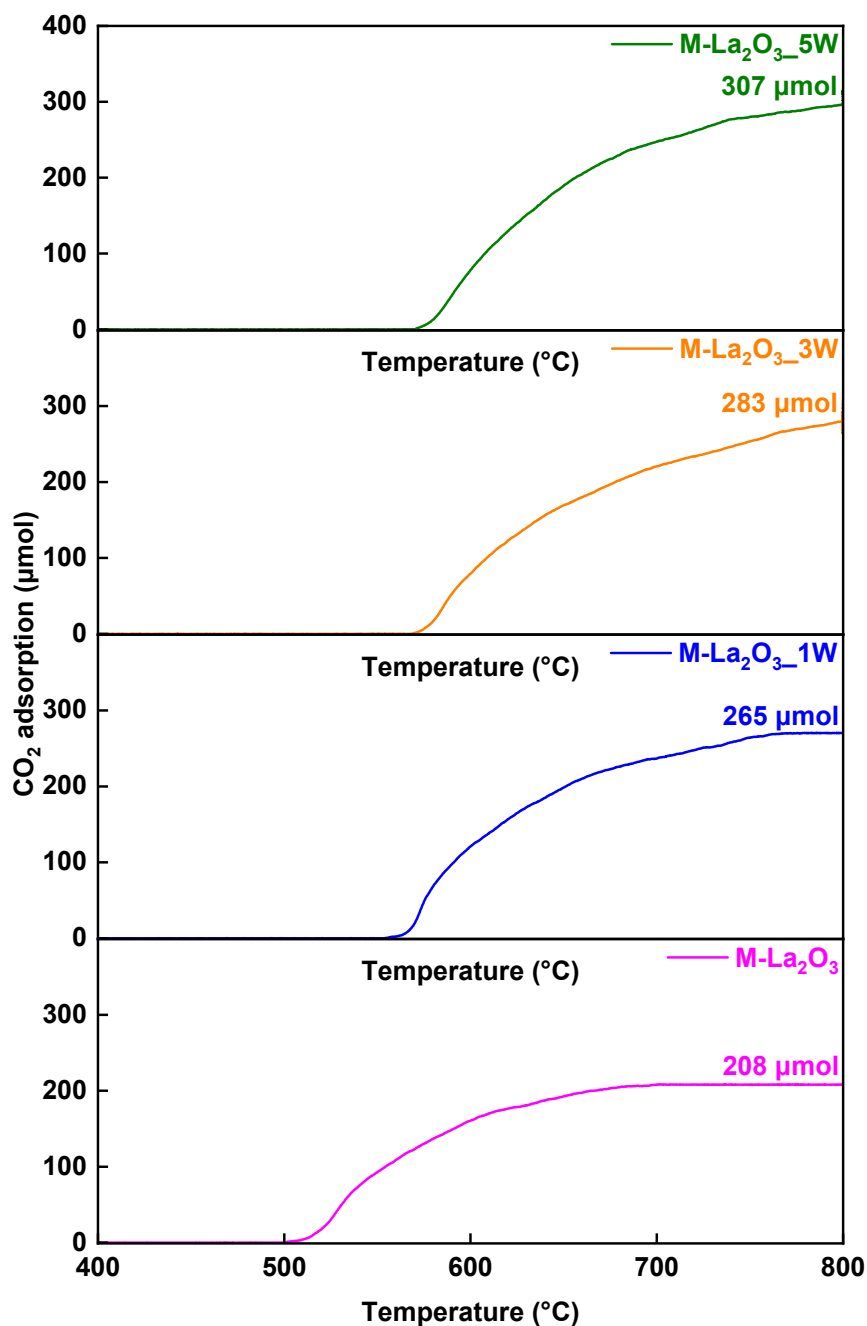

Figure S1. The process of total CO<sub>2</sub> adsorption of four samples in Figure 3 as a function of temperature.

In the main text, the data shown in Figure 3 is highly discrete, especially the conversion of CH<sub>4</sub> and yield of C<sub>2</sub> on M-La<sub>2</sub>O<sub>3</sub>\_3W. Thus, the fitting curves of the discrete data is added to the Figure, and it is

inevitable that there has errors between discrete data and the fitting curves. Figure S2 exhibits all the errors between discrete data and the fitting curves, standard deviation line and mean absolute deviation (MAD). Some calculated detailed are shown as below:

The standard deviation is estimated by:

$$\sigma = \pm \sqrt{\frac{\sum_{i=1}^n (x_i - \mu)^2}{n}} \quad (1)$$

The mean absolute deviation is estimated by:

$$\text{MAD} = \frac{1}{n} \sum_{i=1}^n |x_i - \mu| \quad (2)$$

Where  $\sigma$  is the standard deviation, it is shown as two lines in Figure S2.

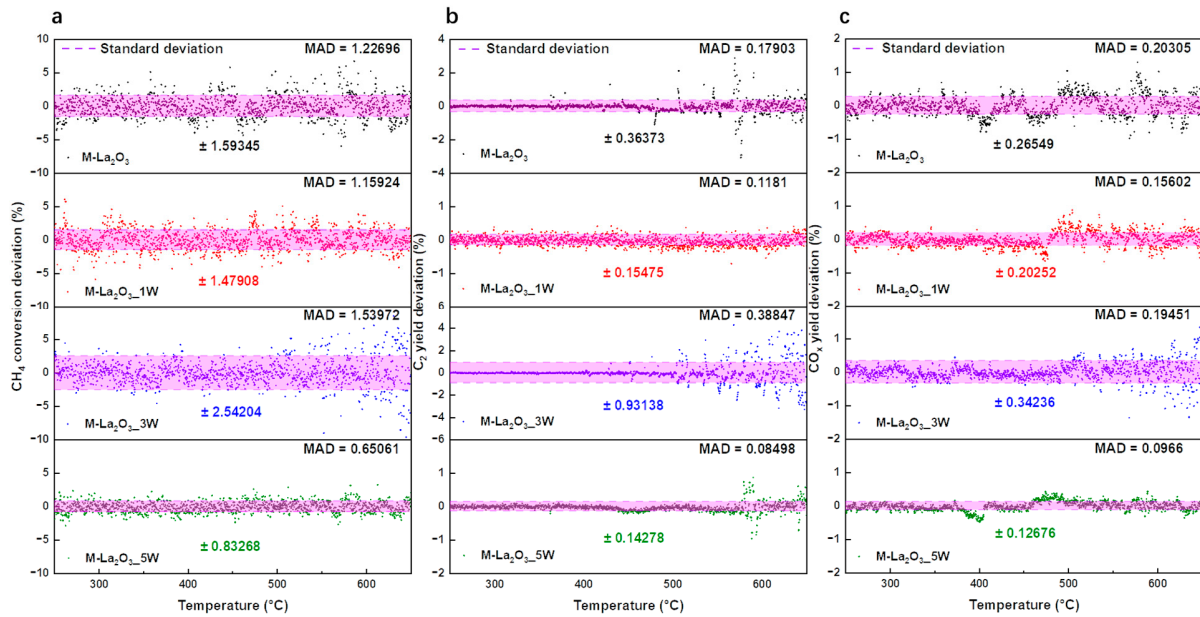

**Figure S2** Plots of the standard deviation and mean absolute deviation between the a) CH<sub>4</sub> conversion, b) C<sub>2</sub> yield and c) CO<sub>x</sub> yield discrete data and the fitting curves in Fig 4. The purple area is the standard deviation range for each set of data.

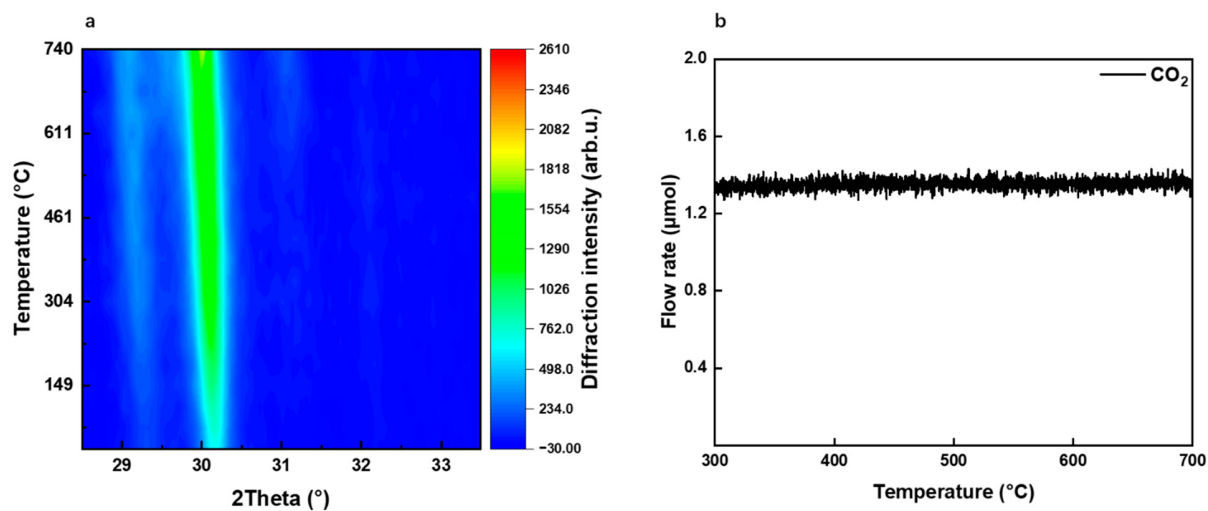

Figure S3 a) *In situ* XRD and b) online MS result of CO<sub>2</sub> uptake on M-La<sub>2</sub>O<sub>3</sub>\_5W with 10% CO<sub>2</sub>-Ar (20 sccm), sample loading is 0.10 g.

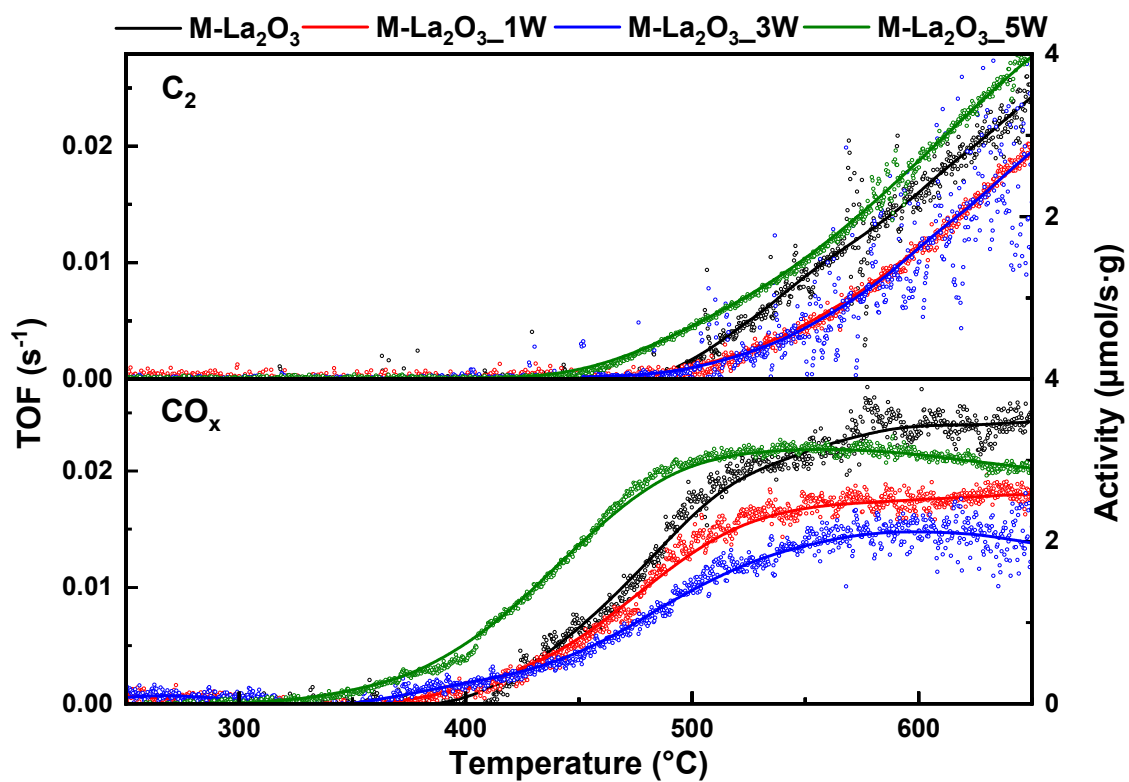

Figure S4 The C<sub>2</sub>, CO<sub>x</sub> activity and TOF calculated from Figure 4.
